# Supplementary material for: Serum Dickkopf-1 as a Biomarker for the Diagnosis of Hepatocellular Carcinoma
Source: PubMed Central journal article supplement — Yonsei Med J. 2015 Jul 29;56(5):1296–306. doi: 10.3349/ymj.2015.56.5.1296 (PMC4541659; doi:10.3349/ymj.2015.56.5.1296), 2015-07-29
Supplement: ymj-56-1296-s001.pdf [file ymj-56-1296-s001.pdf]

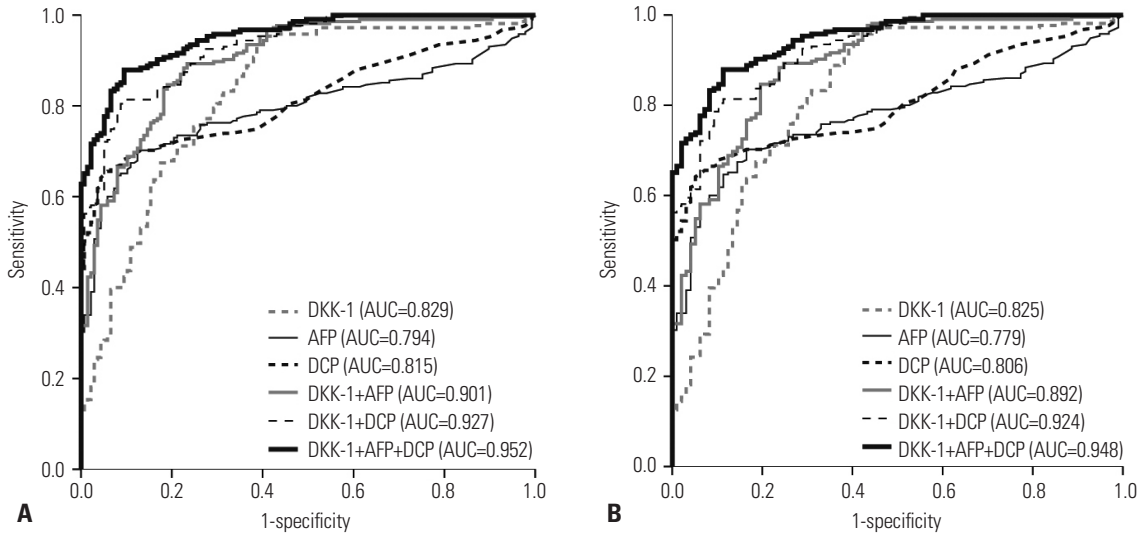

**Supplementary Fig. 1.** ROC curves of DKK-1, AFP, DCP, and their combinations in diagnosing HCC. (A) ROC curves for HCC patients versus all control groups. DKK-1 diagnosed HCC better than AFP and DCP. The combination of three markers (DKK-1, AFP, and DCP) achieved the best accuracy. (B) ROC curves for HCC patients versus all control groups with a risk of HCC. DKK-1 diagnosed HCC better than AFP and DCP. The combination of three markers (DKK-1, AFP, and DCP) achieved the best accuracy. DKK-1, dickkopf-1; AUC, areas under the curves; AFP, alpha-fetoprotein; DCP, des-gamma-carboxy prothrombin; HCC, hepatocellular carcinoma.
