# Supplementary material for: Serum Dickkopf-1 as a Biomarker for the Diagnosis of Hepatocellular Carcinoma
Source: PubMed Central journal article supplement — Yonsei Med J. 2015 Jul 29;56(5):1296–306. doi: 10.3349/ymj.2015.56.5.1296 (PMC4541659; doi:10.3349/ymj.2015.56.5.1296), 2015-07-29
Supplement: ymj-56-1296-s002.pdf [file ymj-56-1296-s002.pdf]

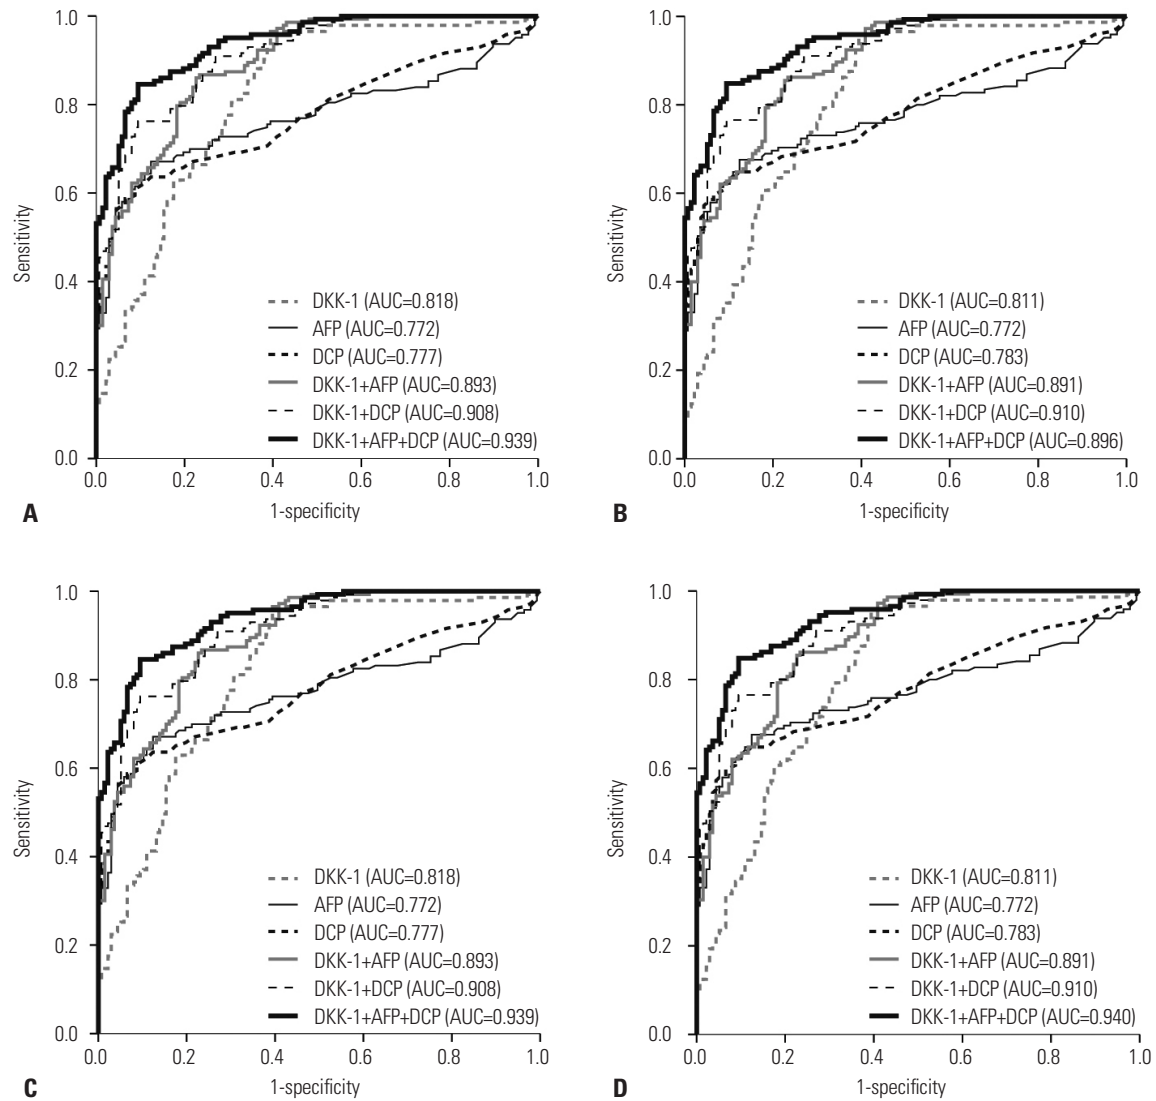

**Supplementary Fig. 2.** ROC curves of DKK-1, AFP, DCP, and their combinations in diagnosing early-stage HCC. (A) ROC curves for patients with early-stage HCC (TNM I–II) versus all control groups. (B) ROC curves for patients with early-stage HCC (TNM I–II) versus all control groups at risk of HCC. (C) ROC curves for patients with early-stage HCC (BCLC A–B) versus all control groups. (D) ROC curves for patients with early-stage HCC (BCLC C–D) versus all control groups at risk of HCC. In all the sub-group analysis, the combination of three markers (DKK-1, AFP, and DCP) achieved the best accuracy. DKK-1, dickkopf-1; AUC, areas under the curves; AFP, alpha-fetoprotein; DCP, des-gamma-carboxy prothrombin; HCC, hepatocellular carcinoma; TNM, Tumor-Node-Metastasis; BCLC, Barcelona Clinic Liver Cancer.
