# Supplementary material for: Serum Dickkopf-1 as a Biomarker for the Diagnosis of Hepatocellular Carcinoma
Source: PubMed Central journal article supplement — Yonsei Med J. 2015 Jul 29;56(5):1296–306. doi: 10.3349/ymj.2015.56.5.1296 (PMC4541659; doi:10.3349/ymj.2015.56.5.1296), 2015-07-29
Supplement: ymj-56-1296-s003.pdf [file ymj-56-1296-s003.pdf]

**Supplementary Table 1.** Baseline Study Population Characteristics

|                                | <b>Controls (n=153)</b> | <b>Patients with HCC (n=217)</b> | <b><i>p</i> value</b> |
|--------------------------------|-------------------------|----------------------------------|-----------------------|
| Age, yr                        | 52.9±13.9               | 53.7±9.0                         | ns                    |
| Male gender                    | 98 (64.0)               | 150 (69.1)                       | ns                    |
| Liver cirrhosis                | 67 (43.8)               | 165 (76.4)                       | <0.001                |
| HBsAg positive                 | 91 (59.9)               | 182 (85.3)                       | <0.001                |
| Alanine aminotransferase, IU/L | 32.3±27.7               | 54.6±109.1                       | 0.004                 |

HCC, hepatocellular carcinoma; HBsAg, hepatitis B surface antigen; ns, not significant.  
Variables are expressed as mean±SD or n (%).
