# Supplementary material for: Serum Dickkopf-1 as a Biomarker for the Diagnosis of Hepatocellular Carcinoma
Source: PubMed Central journal article supplement — Yonsei Med J. 2015 Jul 29;56(5):1296–306. doi: 10.3349/ymj.2015.56.5.1296 (PMC4541659; doi:10.3349/ymj.2015.56.5.1296), 2015-07-29
Supplement: ymj-56-1296-s004.pdf [file ymj-56-1296-s004.pdf]

**Supplementary Table 2.** Diagnostic Accuracy of DKK-1, AFP, and DCP in Diagnosing Early-Stage HCC

|                                                                           | <b>AUC</b> | <b>95% CI</b> | <b>Sensitivity (%)</b> | <b>Specificity (%)</b> | <b>PPV (%)</b> | <b>NPV (%)</b> | <b>+LR</b> | <b>-LR</b> |
|---------------------------------------------------------------------------|------------|---------------|------------------------|------------------------|----------------|----------------|------------|------------|
| Early-stage HCC (TNM I-II) vs. all controls                               |            |               |                        |                        |                |                |            |            |
| DKK-1                                                                     | 0.818      | 0.768–0.868   | 89.0                   | 62.9                   | 69.7           | 85.6           | 2.40       | 0.18       |
| AFP                                                                       | 0.772      | 0.714–0.830   | 61.8                   | 89.5                   | 84.8           | 71.4           | 5.91       | 0.43       |
| DCP                                                                       | 0.777      | 0.721–0.833   | 59.2                   | 93.5                   | 90.3           | 69.1           | 9.14       | 0.44       |
| DKK-1 plus AFP                                                            | 0.893      | 0.857–0.928   | 86.2                   | 76.2                   | 77.6           | 85.2           | 3.62       | 0.18       |
| DKK-1 plus DCP                                                            | 0.908      | 0.876–0.941   | 76.2                   | 90.5                   | 89.3           | 78.5           | 8.03       | 0.26       |
| DKK-1 plus AFP plus DCP                                                   | 0.939      | 0.913–0.964   | 84.6                   | 90.5                   | 90.3           | 84.9           | 8.92       | 0.17       |
| Early-stage HCC (BCLC A–B) vs. all controls                               |            |               |                        |                        |                |                |            |            |
| DKK-1                                                                     | 0.811      | 0.760–0.862   | 85.0                   | 62.9                   | 69.1           | 81.2           | 2.29       | 0.24       |
| AFP                                                                       | 0.772      | 0.714–0.830   | 61.6                   | 89.5                   | 84.9           | 71.0           | 5.89       | 0.43       |
| DCP                                                                       | 0.783      | 0.728–0.838   | 60.4                   | 93.5                   | 90.6           | 69.5           | 9.33       | 0.42       |
| DKK-1 plus AFP                                                            | 0.891      | 0.855–0.927   | 83.7                   | 76.2                   | 77.4           | 82.7           | 3.51       | 0.21       |
| DKK-1 plus DCP                                                            | 0.910      | 0.878–0.942   | 75.9                   | 90.5                   | 89.4           | 78.0           | 7.99       | 0.27       |
| DKK-1 plus AFP plus DCP                                                   | 0.940      | 0.915–0.965   | 84.1                   | 90.5                   | 90.4           | 84.4           | 8.87       | 0.18       |
| Early-stage HCC (TNM I-II)<br>vs. all controls except healthy subjects    |            |               |                        |                        |                |                |            |            |
| DKK-1                                                                     | 0.818      | 0.768–0.868   | 89.0                   | 63.1                   | 75.9           | 81.4           | 2.41       | 0.17       |
| AFP                                                                       | 0.772      | 0.714–0.830   | 61.4                   | 85.8                   | 84.8           | 63.4           | 4.33       | 0.45       |
| DCP                                                                       | 0.777      | 0.721–0.833   | 59.2                   | 91.9                   | 91.3           | 61.1           | 7.32       | 0.44       |
| DKK-1 plus AFP                                                            | 0.893      | 0.857–0.928   | 85.5                   | 75.7                   | 82.1           | 80.0           | 3.52       | 0.19       |
| DKK-1 plus DCP                                                            | 0.908      | 0.876–0.941   | 76.2                   | 8.7                    | 90.8           | 71.7           | 6.72       | 0.27       |
| DKK-1 plus AFP plus DCP                                                   | 0.939      | 0.913–0.964   | 84.6                   | 88.7                   | 91.7           | 79.6           | 7.46       | 0.17       |
| Early-stage HCC by (BCLC A–B)<br>vs. all controls except healthy subjects |            |               |                        |                        |                |                |            |            |
| DKK-1                                                                     | 0.811      | 0.760–0.862   | 85.0                   | 63.1                   | 75.3           | 76.1           | 2.30       | 0.24       |
| AFP                                                                       | 0.772      | 0.714–0.830   | 61.6                   | 85.8                   | 84.9           | 63.4           | 4.35       | 0.45       |
| DCP                                                                       | 0.783      | 0.728–0.838   | 60.4                   | 91.9                   | 91.6           | 61.5           | 7.48       | 0.43       |
| DKK-1 plus AFP                                                            | 0.891      | 0.855–0.927   | 83.0                   | 75.7                   | 81.9           | 77.1           | 6.41       | 0.22       |
| DKK-1 plus DCP                                                            | 0.910      | 0.878–0.942   | 75.9                   | 88.7                   | 90.9           | 71.1           | 6.69       | 0.27       |
| DKK-1 plus AFP plus DCP                                                   | 0.940      | 0.915–0.965   | 84.1                   | 88.7                   | 91.7           | 78.9           | 7.42       | 0.18       |

DKK-1, dickkopf-1; HCC, hepatocellular carcinoma; AFP, alpha-fetoprotein; DCP, des-gamma-carboxy prothrombin; AUC, area under receiver operating characteristic curve; CI, confidence interval; PPV, positive predictive value; NPV, negative predictive value; LR, likelihood ratio; TNM, Tumor-Node-Metastasis; BCLC, Barcelona Clinic Liver Cancer.

The optimum predicted probabilities of DKK-1, AFP, DCP, and their combination were derived from their respective ROC curves by maximizing the sum of sensitivity and specificity and minimizing the overall error.
