# Supplementary material for: Serum Dickkopf-1 as a Biomarker for the Diagnosis of Hepatocellular Carcinoma
Source: PubMed Central journal article supplement — Yonsei Med J. 2015 Jul 29;56(5):1296–306. doi: 10.3349/ymj.2015.56.5.1296 (PMC4541659; doi:10.3349/ymj.2015.56.5.1296), 2015-07-29
Supplement: ymj-56-1296-s005.pdf [file ymj-56-1296-s005.pdf]

**Supplementary Table 3.** Correlation of DKK-1 with Other Microscopic Characteristics of HCC (n=80)

|                             | <b>Coefficient</b> | <b>p value</b> |
|-----------------------------|--------------------|----------------|
| Activity                    | 0.232              | 0.040          |
| Satellite nodule            | 0.203              | 0.072          |
| Microvessel invasion        | -0.148             | 0.195          |
| Edmonson grade              | -0.113             | 0.320          |
| Fibrosis                    | 0.093              | 0.414          |
| Total size                  | 0.082              | 0.472          |
| Maximal size                | 0.053              | 0.641          |
| Number, single vs. multiple | -0.052             | 0.640          |

DKK-1, dickkopf-1; HCC, hepatocellular carcinoma.
